# Supplementary material for: A plant-derived biostimulant Aminolom Enzimatico® application stimulates chlorophyll content, electrolyte leakage, stomata density and root yield of radishes under salinity stress
Source: PeerJ. 2025 Jan 24;13:e18804. doi: 10.7717/peerj.18804 (PMC11771304; doi:10.7717/peerj.18804)
Supplement: Supplemental Information 1 [file peerj-13-18804-s001.xlsx]

## Sheet: Sayfa1
Root diameter
	Control	Biostimulant	St error
0 mM	34.78	38.04	0.39	0.31
50 mM	29.6	31.84	0.68	0.72
100 mM	28.46	28.91	0.27	0.43
150 mM	24.61	25.66	0.2	0.68
200 mM	19.88	21.03	0.5	0.71
Root fresh weight
	Control	Biostimulant
0 mM	21.77	24.34	0.22	0.41
50 mM	13.57	15.61	0.39	0.41
100 mM	10.37	11.34	0.24	0.24
150 mM	7.67	8.11	0.24	0.31
200 mM	6.25	5.1	0.25	0.25
Water soluble dry matter (brix)
	Control	Biostimulant
0 mM	3.3	3.73	0.1	0.05
50 mM	5.23	5.68	0.3	0.22
100 mM	6.3	6.2	0.12	0.14
150 mM	6.73	8.48	0.14	0.15
200 mM	8.78	9.38	0.17	0.14
Chlorophyll content (SPAD)
	Control	Biostimulant
0 mM	22.08	22.1	0.42	0.5
50 mM	23.48	23.48	0.56	0.18
100 mM	23.43	23.75	0.31	0.13
150 mM	23.18	23.85	0.11	0.41
200 mM	24.33	24.33	0.33	0.5
Leaf area
	Control	Biostimulant
0 mM	301	328	5.72	4.95
50 mM	195	249	2.5	6.1
100 mM	140	174	5.85	3.97
150 mM	92	137	0.5	1.44
200 mM	92	131	1	3.42
Electrolyte leakage
	Control	Biostimulant
0 mM	13	13.5	1.18	0.54
50 mM	51	42	1.72	1.1
100 mM	60	55	0.4	0.9
150 mM	56	54	0.5	0.4
200 mM	46	44	1.5	0.6
RWC
	Control	Biostimulant
0 mM	81.5	82.3	1.1	0.3
50 mM	70.2	68.97	0.6	0.7
100 mM	69.12	69.3	0.7	0.4
150 mM	70.2	65.72	0.8	1
200 mM	72.35	63.85	1.6	1.6
Stomata number lower epidermis
	Control	Biostimulant
0 mM	136	195	7.15	9.7
50 mM	193	175	3.5	10.3
100 mM	212	159	7.3	6.7
150 mM	177	243	16.6	13.3
200 mM	217	223	14.1	10.6
Stomata number upper epidermis
	Control	Biostimulant
0 mM	90	98	3	6.1
50 mM	108	119	5.4	6
100 mM	115	87	3.6	3.3
150 mM	130	143	5.2	6.3
200 mM	136	160	7.8	6.8
RI
	Control	Biostimulant
50 mM	58.7	48.6	2.62	1.19
100 mM	69	63.4	0.9	1.3
150 mM	63.9	61.3	1.8	1.5
200 mM	53.1	51.3	2.2	1
Biomass weight
	Control	Biostimulant
0 mM	33.22	34.71	0.55	0.75
50 mM	20.79	23.33	0.34	0.36
100 mM	12.58	15.36	0.72	0.45
150 mM	8.85	12.99	0.56	0.61
200 mM	8.46	9.32	0.11	0.45
Stoma size lower epidermis
	Control	Biostimulant
0 mM	261	350	5.81	13.6
50 mM	220	260	5.92	6.8
100 mM	310	221	16.75	7.27
150 mM	253	271	16	7.45
200 mM	232	247	12	9
Stoma size upper epidermis
	Control	Biostimulant
0 mM	235	284	7.3	7.2
50 mM	220	235	8.5	8.5
100 mM	290	224	15.1	14.8
150 mM	240	239	13.9	7.43
200 mM	232	265	21.8	10.3
