# Supplementary material for: A plant-derived biostimulant Aminolom Enzimatico® application stimulates chlorophyll content, electrolyte leakage, stomata density and root yield of radishes under salinity stress
Source: PeerJ. 2025 Jan 24;13:e18804. doi: 10.7717/peerj.18804 (PMC11771304; doi:10.7717/peerj.18804)
Supplement: Supplemental Information 2 [file peerj-13-18804-s002.xlsx]

## Sheet: Data
Rep	Salinity	Biostim	Root diameter	Root weight	Root lenth	Biyomas weight	Brix	SPAD	Leaf temperature	Leaf area	RWC	Kuru madde	Turgor kaybı
1	0	1	38.84	24807	50.69	36.44	3.8	33	21.5	285	79.21	9.21366	23.8284
2	0	1	38.23	22076	40.61	32.6	3.7	37.6	22.8	325	81.4745	10.8583	20.2689
3	0	1	35.52	20298	40.9	30.33	3.5	34.5	22.2	318	82.5425	7.98403	19.4611
4	0	1	37.58	25687	42.22	36.49	3.8	35.7	21.9	287	82.816	8.67971	18.9487
1	0	0	35.86	21611	39.81	30.82	3.4	35	21.5	337	80.3099	8.59662	22.41
2	0	0	34.09	21237	43.38	33.39	3.4	35	21.7	311	83.4399	6.44951	18.5668
3	0	0	34.78	22173	42.77	34.49	3.4	38.6	22	336	83.3333	7.42101	18.5158
4	0	0	34.4	23672	45.14	33.21	3	32.6	23.1	318	79.0497	8.5	24.25
1	50	1	32.79	14875	33.99	24.3	5.2	36.4	23.5	195	67.4584	9.3617	43.7234
2	50	1	31.93	16582	39.93	20.8	6.6	35.3	24	205	67.7741	9.33333	43.1111
3	50	1	31	15	35	23.44	6.1	36.7	22.6	183	70.6761	8.26531	38.0612
4	50	1	31.67	15.9	34.93	22.8	5.4	35.4	23.8	196	70.057	7.91444	39.3583
1	50	0	30.75	14.24	36643	20.8	5.4	29	23.4	252	70.6064	7.78523	38.3893
2	50	0	29.44	14453	35.86	21.1	6.3	30.8	23.4	229	68.3625	8.8017	42.2057
3	50	0	28.63	11446	35.61	16.85	4.5	36.9	24	275	70.7811	8.933	37.5931
4	50	0	34.19	16834	38.46	24.43	4.7	37.1	23.1	240	71.1387	8.01749	37.3178
1	100	1	25.59	9.8	28.81	14.56	5.8	32.5	24.1	153	68.2744	7.94798	42.7746
2	100	1	28	13	30	14.92	6.4	32	23.9	123	70.0599	6.0241	40.1606
3	100	1	28.4	11382	31.74	16.61	6.4	35.2	22.8	157	69	7	41
4	100	1	27.68	11.39	30.18	15.36	6.2	32.8	24.2	118	70	7.02479	39.8465
1	100	0	28.91	11.96	29.07	14.88	6.2	35.2	23.7	166	68.3621	8.85057	42.1839
2	100	0	28.65	10496	26.5	13.74	5.6	35.1	23.8	184	69.2308	9.18919	40.3604
3	100	0	28.3	9.55	25.65	11.71	6.5	39	23	177	71.1039	8.27225	37.2775
4	100	0	28	10	26	11	6.5	37.5	23.2	170	67.495	10.4222	43.1398
1	150	1	23.73	7841	27.13	12.17	7.4	42.5	24.3	90	69.6373	8.81954	39.7558
2	150	1	26.68	9	35.43	16.77	8.9	40	24.1	96	61.5104	9.22367	56.8025
3	150	1	27	7973	24.66	10.23	8.4	43.9	23.4	92	67.2098	8.33333	44.7222
4	150	1	23.24	7635	30.31	12.79	9.2	42.1	23.6	88	64.0208	10.2911	50.4158
1	150	0	25.11	7754	23.45	10.41	6.7	38.4	22.8	133	74.4493	8.02721	31.5646
2	150	0	24.64	8126	26.84	8.91	6.4	38	22.8	145	69.5594	7.13012	40.6417
3	150	0	25	7	25	8	6.7	38.4	23.6	122	70.6854	7.5594	38.3369
4	150	0	22.69	6821	26.27	7.08	8.1	41	23.5	147	68.2759	8.89571	42.3313
1	200	1	20.95	5.56	24.68	9.81	9.7	42	24.9	93	66.2609	10.5634	45.5399
2	200	1	20.61	5706	28	10.25	9.2	44.9	25.1	83	57.9384	12.8342	63.2799
3	200	1	21	7	27	9	9.5	47.8	23.5	90	66.568	9.63855	45.3815
4	200	1	21.59	5669	26.25	8.22	9.1	42.4	23.8	100	62.585	12.2417	52.4642
1	200	0	19.71	4.2	24.25	8.23	8.8	48	23.8	124	76.2337	6.92521	29.0166
2	200	0	21.32	5777	25.29	8.75	9	43.2	24	132	75.6972	8.06452	29.5161
3	200	0	19.5	6034	29.5	8.4	8.3	43.2	24.6	150	71.6216	9.69856	35.7798
4	200	0	19	4116	27	8.46	10	44	24.9	118	68.4089	9.36864	41.8534

## Sheet: Stomata
			Stoma number		Stoma width		Stoma length		Stoma size		Stoma Index
Rep	Biostim	Salinity	Lower (1 mm2)	Upper (1 mm2)	Lower (µm)	Upper (µm)	Lower (µm)	Upper (µm)	Lower (µm2)	Upper (µm2)	Lower	Upper
1	A+	K	189.759	115.462	17.5473	14.6231	27.5446	24.059	379.608	276.316	1.56974	1.64527
2	A+	K	199.799	95.3815	16.767	15.2147	23.7885	23.2621	313.265	277.972	1.41877	1.52893
3	A+	K	186.747	87.3494	15.6977	15.5599	28.4779	25.011	351.103	305.653	1.81414	1.6074
4	A+	K	201.807	92.3695	15.9401	13.9904	28.2583	25.2921	353.774	277.91	1.77278	1.80782
1	A+	50	164.041	102.41	14.798	14.4353	22.7604	22.4816	264.528	254.885	1.53808	1.5574
2	A+	50	183	123.494	14.911	13.2759	22.8111	22.2199	267.142	231.684	1.52982	1.6737
3	A+	50	170	130	14.9326	14.2458	20.806	20.9431	244.013	234.326	1.39333	1.47012
4	A+	50	181.727	118.474	15.0516	13.7105	22.8012	20.4262	269.545	219.953	1.51486	1.48983
1	A+	100	177	95	15.2032	14.1356	21.3584	19.2154	255.032	213.332	1.40486	1.35936
2	A+	100	160.643	79.3173	14.4762	14.5	22.0047	20.883	250.184	237.822	1.52007	1.4402
3	A+	100	148.594	87.3494	15.2725	14.1322	23.3744	22.9083	280.375	254.269	1.53049	1.621
4	A+	100	150	85
1	A+	150	255	156	14.2592	14.0544	18.7436	20.2671	209.912	223.714	1.31449	1.44205
2	A+	150	260.04	147.16	14.0195	12.4904	21.0275	20.1453	231.532	197.624	1.49987	1.61287
3	A+	150	253.012	144.578	14.3984	14.0718	18.5404	19.9215	209.663	220.173	1.28768	1.4157
4	A+	150	203.815	126.043	14.4068	14.3784	20.3104	21.1711	229.813	239.081	1.40978	1.47242
1	A+	200	237.952	164.659	13.7918	12.8923	19.4087	19.0613	210.236	193.007	1.40726	1.47851
2	A+	200	219.88	149.598	14.5843	13.9866	20.4658	20.2537	234.426	222.487	1.40327	1.44808
3	A+	200	194.625	148	13.9716	14.8654	21.1125	22.5759	231.673	263.58	1.5111	1.51868
4	A+	200	240.964	177.711	13.5097	14.1322	19.4266	19.4499	206.126	215.883	1.43797	1.37628
1	A-	K	133	96	14.5094	13.3193	24.955	23.4428	284.379	245.234	1.71992	1.76006
2	A-	K	142.169	88	15.0017	15.0266	25.178	26.3524	296.655	311.007	1.67835	1.75372
3	A-	K	134.538	94	15.4448	15.1466	24.6842	25.4973	299.427	303.319	1.59822	1.68337
4	A-	K	134.538	83.3333	15.5431	14.1276	29.4508	27.0621	359.522	300.275	1.89478	1.91555
1	A-	50	202.811	119.478	14.35	13.1427	22.3322	21.4612	251.695	221.527	1.55625	1.63294
2	A-	50	188.755	111.446	14.6103	14.2638	23.2311	22.9114	266.575	256.671	1.59005	1.60626
3	A-	50	187	94	15.3258	13.7225	23.7287	21.7059	285.619	233.938	1.54829	1.58177
4	A-	50	193.775	108.434	15.1734	13.9605	23.3861	22.2396	278.695	243.848	1.54126	1.59304
1	A-	100	195	109.438	13.2902	13.2684	21.6187	21.1204	225.658	220.094	1.62666	1.59178
2	A-	100	228	122	14.6294	13.1448	20.0866	20.7947	230.792	214.683	1.37303	1.58197
3	A-	100	205	109	15.4561	14.3387	24.2624	24.3565	294.526	274.294	1.56976	1.69865
4	A-	100	218.876	121.486	14.8527	14.0714	22.2096	22.5994	259.081	249.76	1.49532	1.60606
1	A-	150	199.799	144.578	14.394	13.2225	20.5753	31.0015	232.605	321.948	1.42943	2.3446
2	A-	150	167	121	14.4779	14.2266	23.6479	24.5702	268.898	274.537	1.63338	1.72705
3	A-	150	152.919	125.502	15.1468	13.2425	21.428	21.9019	254.914	227.793	1.41469	1.65391
4	A-	150	189.329	127.896	13.3617	13.6212	22.0748	21.8562	231.658	233.819	1.6521	1.60457
1	A-	200	187.751	155.622	15.1828	14.9628	22.4383	20.5374	267.566	241.35	1.47787	1.37256
2	A-	200	231.928	126	14.3105	14.331	19.9634	18.2767	224.377	205.714	1.39502	1.27532
3	A-	200	248.996	142.57	13.4704	13.2835	20.066	20.5759	212.29	214.665	1.48964	1.54898
4	A-	200	199.799	121.486	14.9442	15.8163	19.1432	21.3104	224.687	264.719	1.28097	1.34737
